# Supplementary material
Source: HighWire-hosted journal article supplement (https://hw-f5-jim.highwire.org/content/69/2/364)
Supplement: inline-supplementary-material-1 [file inline-supplementary-material-1.pdf]

## Surgical Graft for Reentrant Arrhythmia

## Supplemental Figure 1: Echocardiography

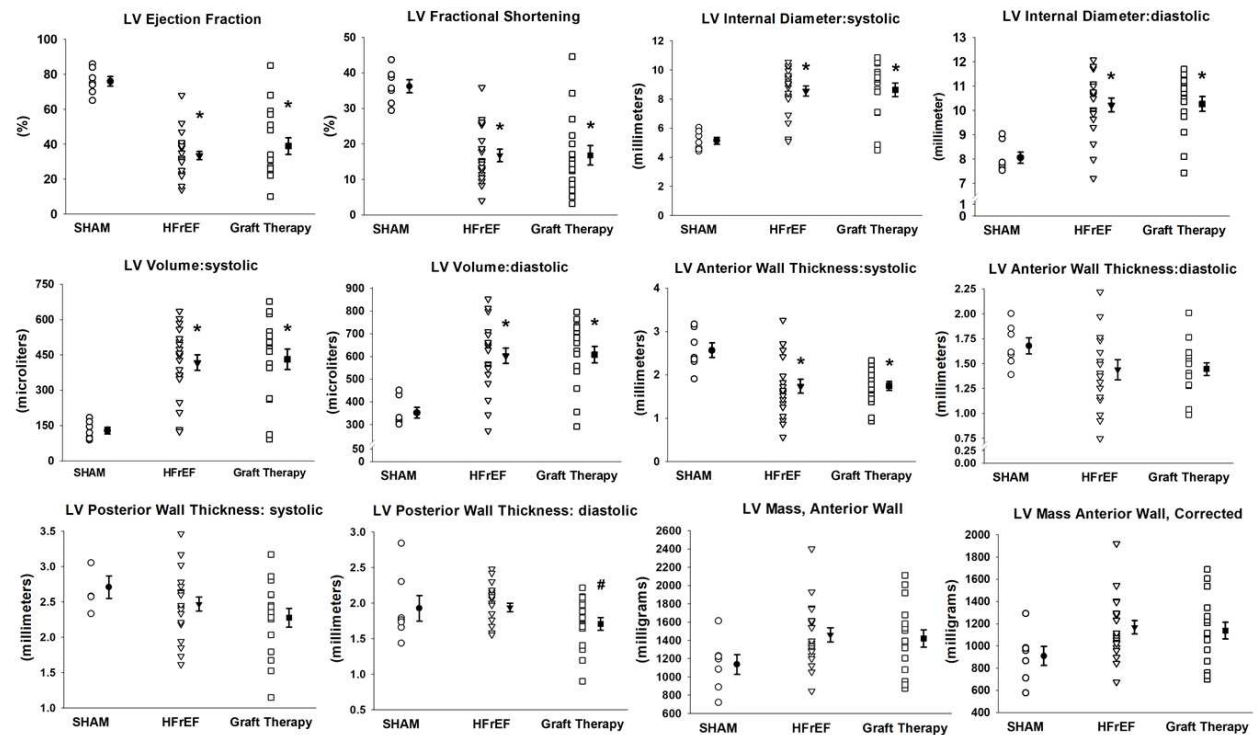

**Supplemental Fig 1.** Echocardiography was performed in short axis M-mode with a dedicated rodent Vevo 2100. Quantified parameters were left ventricular ejection fraction, fractional shortening, internal chamber diameter/volume during systole and diastole, anterior/posterior wall thickness during systole and diastole, and anterior wall mass, corrected by a factor of 0.8. All HFrEF parameters met statistical significance versus SHAM (\*,  $p < 0.05$ ) except left ventricular anterior and posterior wall thickness in diastole, and left ventricular anterior wall mass. Similarly, all Graft Therapy parameters met statistical significance versus SHAM (\*,  $p < 0.05$ ) except left ventricular posterior wall thickness in diastole and left ventricular anterior wall mass. Only left ventricular posterior wall thickness in diastole met statistical significance (#,  $p < 0.05$ ) between HFrEF and graft-treated HFrEF.
