# Supplementary material
Source: HighWire-hosted journal article supplement (https://hw-f5-jim.highwire.org/content/69/2/364)
Supplement: inline-supplementary-material-2 [file inline-supplementary-material-2.pdf]

## Surgical Graft for Reentrant Arrhythmia

## Supplemental Figure 2: Invasive Hemodynamics

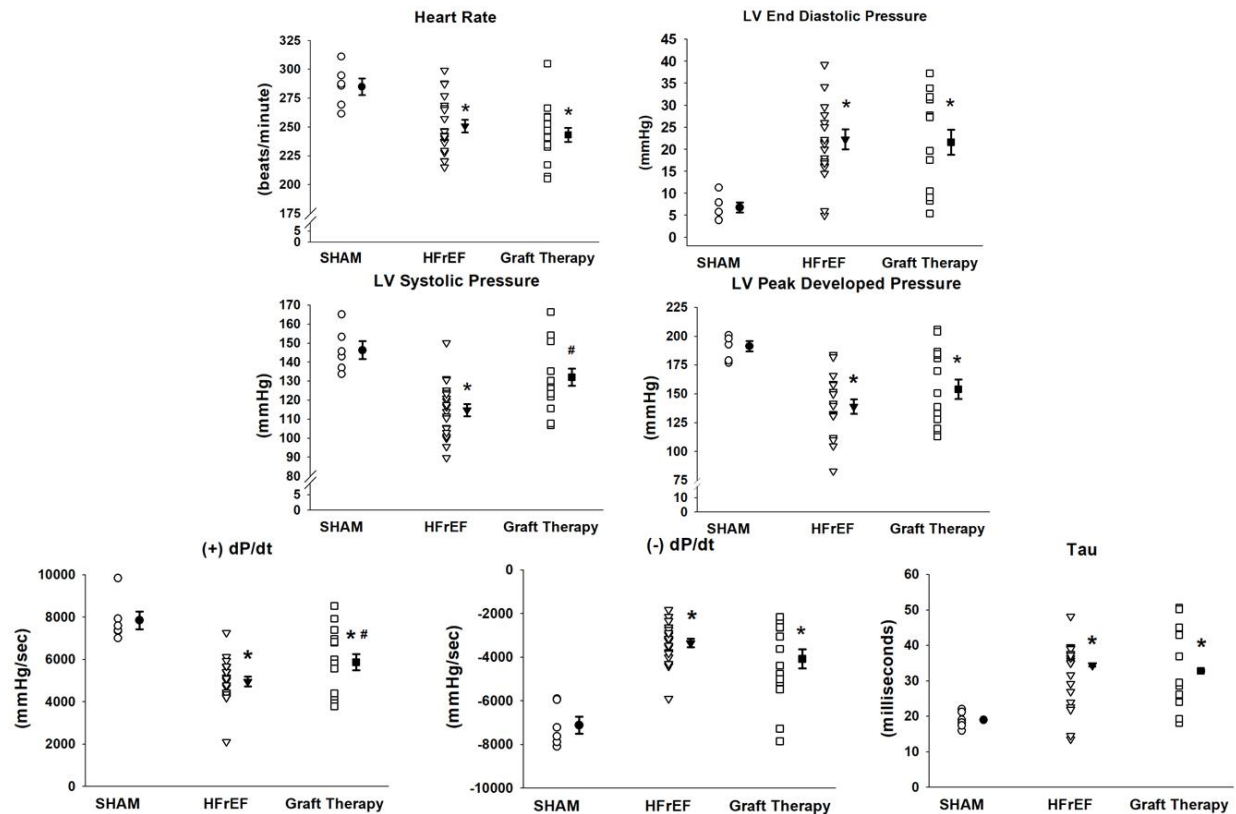

**Supplemental Fig 2.** Invasive hemodynamic quantification was performed immediately prior to the terminal electrophysiology study with a solid-state micromanometer-tipped catheter (ADInstruments). Quantified parameters were heart rate, left ventricular end-diastolic pressure, systolic pressure, peak-developed pressure, relaxation constant Tau, and  $\pm dP/dt$ . All HFrEF parameters met statistical significance versus SHAM (\*,  $p < 0.05$ ). Similarly, all Graft Therapy parameters met statistical significance versus SHAM (\*,  $p < 0.05$ ) except left ventricular systolic pressure. Only left ventricular systolic pressure and (+)  $dP/dt$  met statistical significance (#,  $p < 0.05$ ) between HFrEF and graft-treated HFrEF.
